# Supplementary material for: Subtype-independent near full-length HIV-1 genome sequencing and assembly to be used in large molecular epidemiological studies and clinical management
Source: PubMed Central journal article supplement (PMC4482814; doi:10.7448/ias.18.1.20035), 2015-06-25
Supplement: JIAS-18-20035-s001.pdf [file JIAS-18-20035-s001.pdf]

Supplementary Data 2.txt

```
#!/usr/bin/perl
use strict;
use warnings;
$|=1

##### General Information #####
#Use multiple alignment in FASTA format as input. Choose txt file location for output.
#First sequence has to be reference every other sequence is compared to.

#Coordinates for HIV-1 gene map can be derived from SequenceLocator at
[http://www.hiv.lanl.gov/content/sequence/LOCATE/locate.html]
#using the reference sequence
#Create gene map:
#Frame1 Gag, Vif, Tat_Exon2, Nef
#Frame2 Tat_Exon1, Vpu, Rev_Exon2
#Frame3 Pol, Vpr, Rev_Exon1, Env
#my $gag = 1;
#my $pol = 2;
#my $vif = 3;
#my $vpr = 4;
#my $tat = 5;
#my $rev = 6;
#my $vpu = 7;
#my $env = 8;
#my $nef = 9;
#print OUT "$gag " x ".$same "x ".$vif" x ".$same "x ".$tat "x ".$same "x ".$nef "x ". "\n";
#print OUT "$same "x ".$tat "x ".$same "x ".$vpu "x ".$same "x ".$rev "x ".$same "x ". "\n";
#print OUT "$same "x ".$pol "x ".$same "x ".$vpr "x ".$same "x ".$rev "x ".$same "x ".$env "x ".$same "x ". "\n";
#####

#Infile and Outfile
my $infile = $ARGV[0];
open (IN,$infile) or die "Cannot find txt file with protein alignments\n";
my $outfile = $ARGV[1];
open (OUT,'>'.$outfile) or die "No outputfile declared or no rights to write\n";

#Variables for color coding
my $same = 0;
my $del = 10;
my $ins = 11;
my $mut = 12;

#Variables for genome comparison
my $refheader = <IN>;
chomp $refheader;
my $refseq = <IN>;
chomp $refseq;
my @refary = split(//,$refseq);
my $leng = scalar @refary;
my @mutary;
```

Supplementary Data 2.txt

```
while(<IN>){
  my $line = $_;
  chomp $line;
  if($line =~ />){
    next;
  }else{
    @mutary = split(/,/,$line);
    for(my $i = 0; $i < $leng; $i++){
      #Match in Ref and Sequence => 0
      if($mutary[$i] eq $refary[$i]){
        print OUT "$same ";
      }
      #Not same but gap in Sequence => Deletion => 10
      }elseif($mutary[$i] eq "-"){
        print OUT "$del ";
      }
      #Not same but gap in Ref => Insertion => 11
      }elseif($refary[$i] eq "-"){
        print OUT "$ins ";
      }
      #Not same but no gaps => Mutation => 12
      }else{
        print OUT "$mut ";
      }
    }
  print OUT "\n";
}
exit;
```
